# Supplementary material for: Formulation of the Polysaccharide FucoPol into Novel Emulsified Creams with Improved Physicochemical Properties
Source: Molecules. 2022 Nov 10;27(22):7759. doi: 10.3390/molecules27227759 (PMC9695255; doi:10.3390/molecules27227759)
Supplement: Supplementary file 1 [file molecules-27-07759-s001.zip › molecules-1925403-supplementary.pdf]

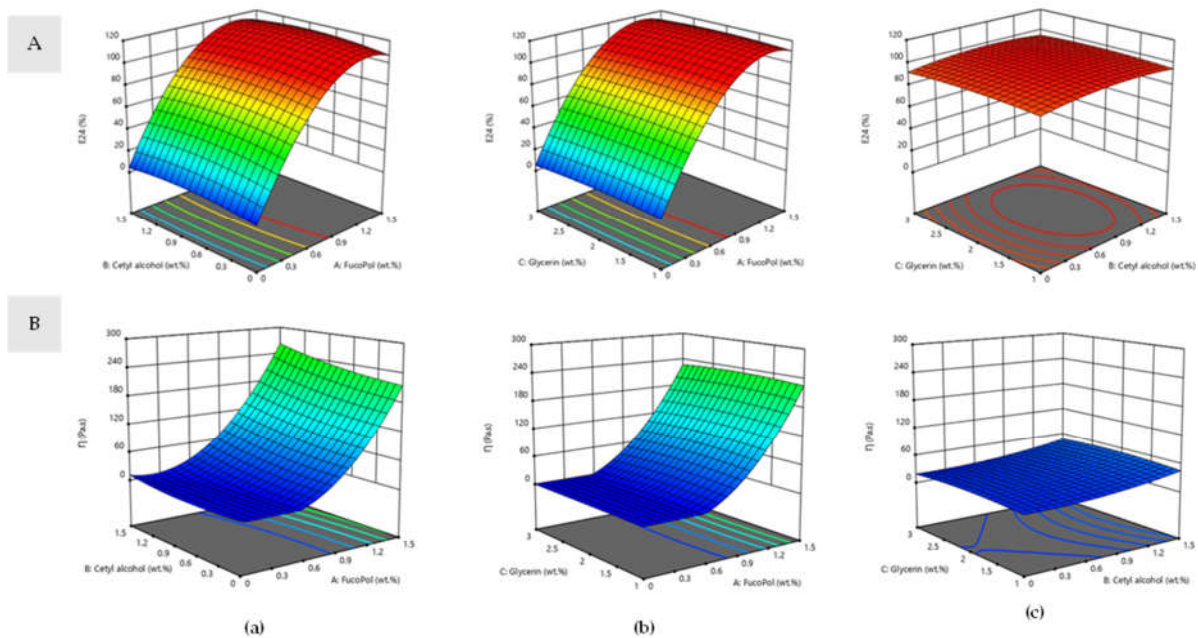

**Figure S1.** Three-dimensional response (A: E24; B:  $\eta$ ) surface plot showing the interactive effects of different ingredients on the O/W emulsion. **(a)** FucoPol and cetyl alcohol (wt.%) with glycerin fixed at 2.0 wt.%, **(b)** FucoPol and glycerin (wt.%) with cetyl alcohol fixed at 0.75 wt.%, **(c)** cetyl alcohol and glycerin (wt.%) with FucoPol fixed at 0.75 wt.%.

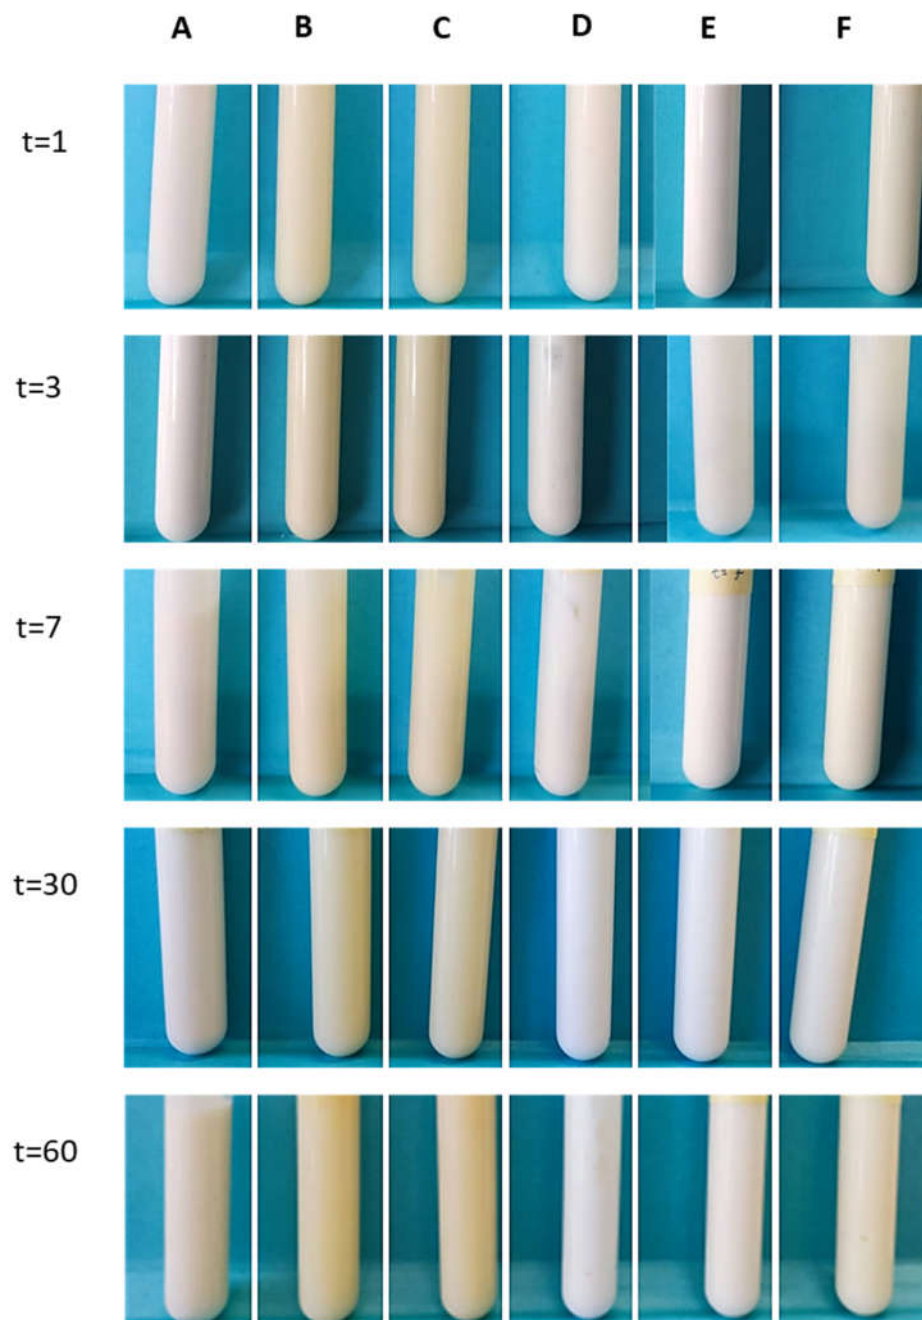

**Figure S2.** Emulsification index (EI=100%) for formulations A, B, C, D, E, F during the storage times: t=1, t=3, t=7, t=30, and t=60.

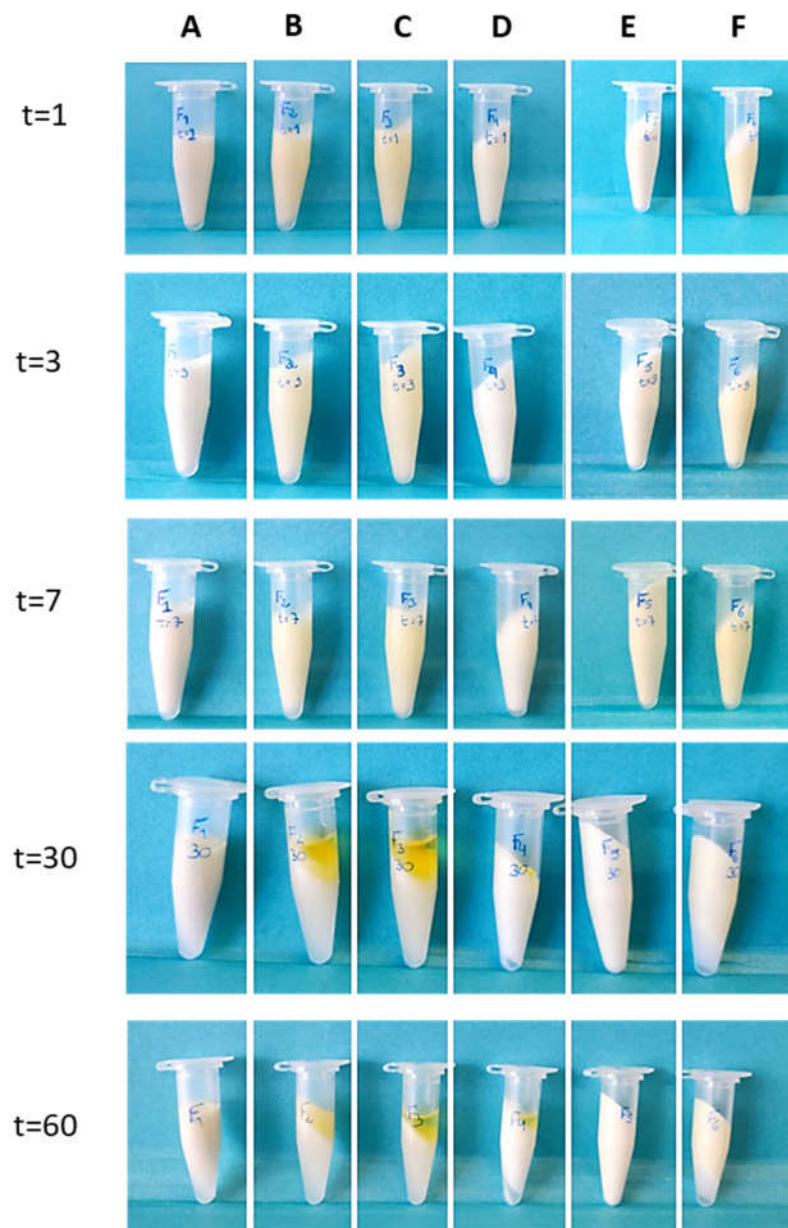

**Figure S3.** Centrifugation test for formulations A, B, C, D, E, F during the storage times: t=1, t=3, t=7, t=30, and t=60.

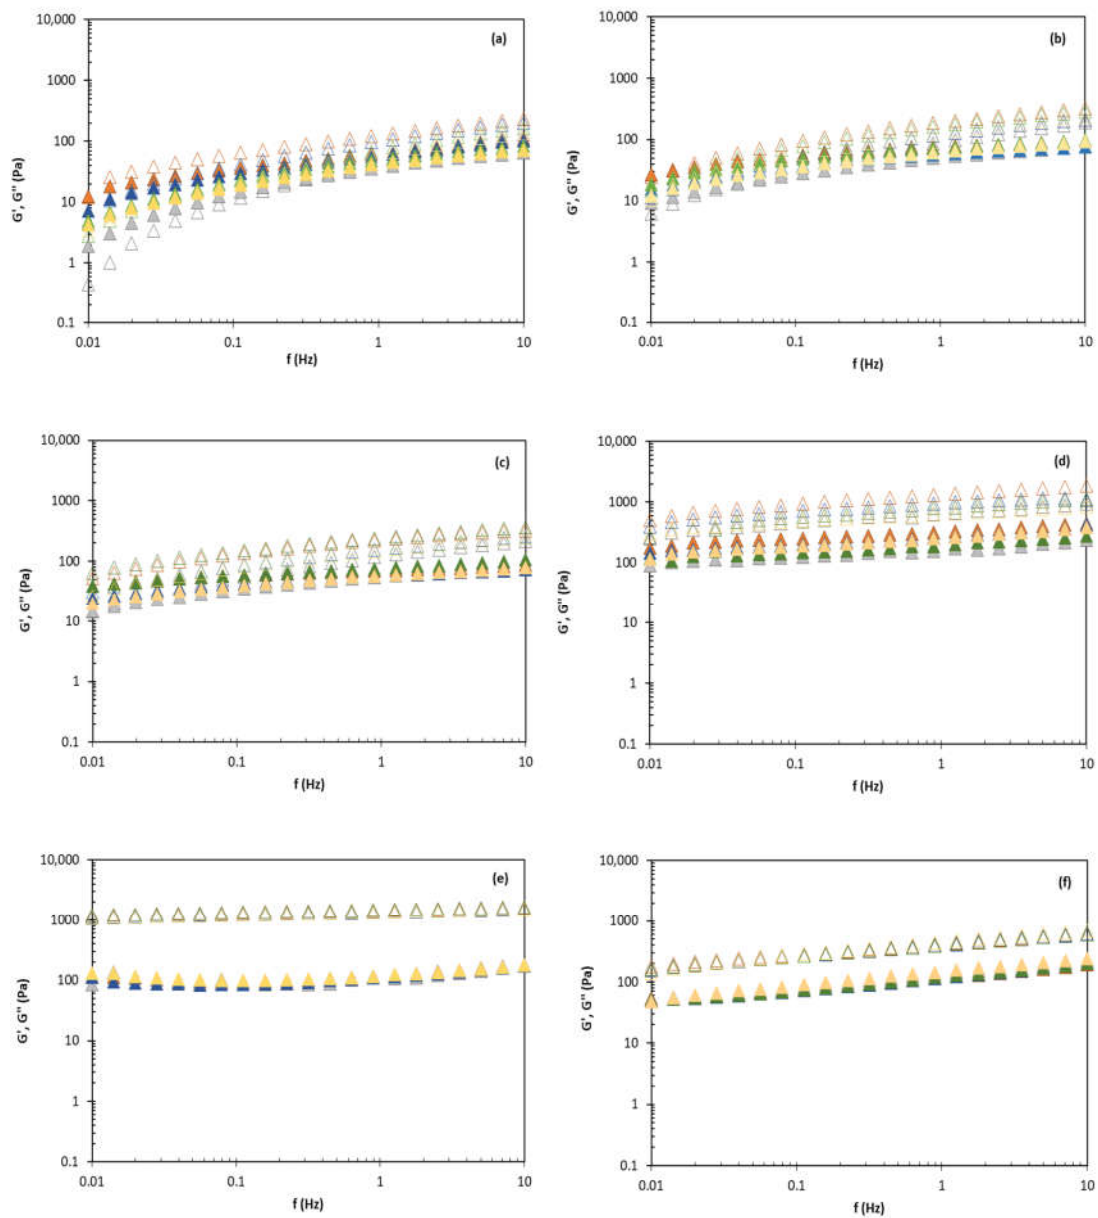

**Figure S4.** Mechanical spectrum for formulations A (a), B (b), C (c), D (d), E (e), and F (f) during the storage times;  $t=1$  (orange),  $t=3$  (blue),  $t=7$  (green),  $t=30$  (yellow), and  $t=60$  (gray).  $G'$  (open triangle) and  $G''$  (closed triangle).
